# Supplementary material for: Development of Integrated Vectors with Strong Constitutive Promoters for High-Yield Antibiotic Production in Mangrove-Derived Streptomyces
Source: MDPI journal article supplement (doi:10.3390/md22020094), 2024-02-18
Supplement: s1 [file s1]

# Development of Integrated Vectors with Strong Constitutive Promoters for High-Yield Antibiotic Production in Mangrove-Derived *Streptomyces*

Mingxia Zhao †, Zhiqiang Yang †, Xinyue Li, Yaqi Liu, Yingying Zhang, Mengqian Zhang, Yangli Li, Xincheng Wang, Zixin Deng, Kui Hong \* and Dongqing Zhu \*

Key Laboratory of Combinatorial Biosynthesis and Drug Discovery, Ministry of Education, School of Pharmaceutical Sciences, Wuhan University, Wuhan 430071, China

\* Correspondence: kuihong31@whu.edu.cn (K.H.); dzhu2011@whu.edu.cn (D.Z.)

† These authors contributed equally to this work.

Table S1. Bacterial strains and plasmids used in this study

| Strain or plasmid                | Relevant phenotype and/or characteristics                                                                                                                                                                                                                                                                                                                                                                              | Source or reference    |
|----------------------------------|------------------------------------------------------------------------------------------------------------------------------------------------------------------------------------------------------------------------------------------------------------------------------------------------------------------------------------------------------------------------------------------------------------------------|------------------------|
| <i>Streptomyces</i> strain       |                                                                                                                                                                                                                                                                                                                                                                                                                        |                        |
| <i>S. coelicolor</i> M145        | Wild-type strain,                                                                                                                                                                                                                                                                                                                                                                                                      |                        |
| <i>S. lividans</i> TK24          | Wild-type strain,                                                                                                                                                                                                                                                                                                                                                                                                      |                        |
| <i>S. venezuelae</i> ISP 5230    | Wild-type strain,                                                                                                                                                                                                                                                                                                                                                                                                      |                        |
| <i>S. olivaceus</i> CGMCC 4.1369 | Wild-type strain                                                                                                                                                                                                                                                                                                                                                                                                       | CGMCC                  |
| <i>S. armeniacus</i> DSM 43125   | Wild-type strain, streptopyrrole and armeniaspirol producer                                                                                                                                                                                                                                                                                                                                                            | DSMZ, [1]              |
| <i>Streptomyces</i> sp. 219807   | Wild-type strain, elaiophylin producer                                                                                                                                                                                                                                                                                                                                                                                 | [2]                    |
| <i>Streptomyces</i> sp. 211726   | Wild-type strain, azalomycin F producer                                                                                                                                                                                                                                                                                                                                                                                | [3, 4]                 |
| <i>Escherichia coli</i> strain   |                                                                                                                                                                                                                                                                                                                                                                                                                        |                        |
| DH10B                            | F <sup>-</sup> <i>mcrA</i> , $\Delta$ ( <i>mrr-hsdRMS-mcrBC</i> ), $\phi$ 80dlacZ $\Delta$ M15, $\Delta$ lacX74, <i>recA1</i> , <i>endA1</i> , <i>araD139</i> , $\Delta$ ( <i>ara</i> , <i>leu</i> )7697, <i>galU</i> , <i>galK</i> , <i>rpsL</i> , <i>nupG</i>                                                                                                                                                        | Gibco BRL              |
| ET12567/pUZ8002                  | F <sup>-</sup> <i>ara-14</i> , <i>leuB6</i> , <i>fhuA13</i> , <i>lacY1</i> , <i>tsx-78</i> , <i>supE44</i> , <i>glnV44</i> , <i>galK2</i> , <i>galT22</i> , <i>mcrA</i> , <i>dcm-6</i> , <i>hisG4</i> , <i>rfbD1</i> , <i>rpsL136</i> , <i>dam-13::Tn9</i> , <i>xyl-5</i> , <i>mtl-1</i> , <i>recF143</i> , <i>thi-1</i> , <i>mcrB</i> , <i>hsdR2</i> , <i>hsdS::Tn10</i> pUZ8002: (derivative of pUB307, <i>tra</i> ) | [5, 6]                 |
| Plasmid                          |                                                                                                                                                                                                                                                                                                                                                                                                                        |                        |
| pEASY-BLUNT Zero vector          | <i>bla</i> , <i>lacZ<math>\alpha</math></i> , T7 promoter                                                                                                                                                                                                                                                                                                                                                              | TransGen               |
| pESI-Blunt simple vector         | <i>bla</i> , <i>neo</i> , <i>lacZ<math>\alpha</math></i> , T7 promoter,                                                                                                                                                                                                                                                                                                                                                | Yeasten                |
| pHZ1358                          | pIJ101 derivative, <i>bla</i> , <i>tsr</i> , <i>oriT</i> , <i>sti</i>                                                                                                                                                                                                                                                                                                                                                  | [7]                    |
| pSET152                          | <i>aac(3)IV</i> , <i>oriT</i> , <i>int</i>                                                                                                                                                                                                                                                                                                                                                                             | [8]                    |
| pIB139                           | <i>aac(3)IV</i> , <i>oriT</i> , <i>int</i> , <i>ermEp*</i>                                                                                                                                                                                                                                                                                                                                                             | [9]                    |
| pIB-KasOp*                       | <i>aac(3)IV</i> , <i>oriT</i> , <i>int</i> , <i>kasOp*</i>                                                                                                                                                                                                                                                                                                                                                             | Group Xudong Qu [10]   |
| pWHU2449                         | <i>aac(3)IV</i> , <i>oriT</i> , <i>int</i> , <i>ermEp*-sfp-svp</i>                                                                                                                                                                                                                                                                                                                                                     | [11]                   |
| pJTU3957                         | <i>aac(3)IV</i> , <i>oriT</i> , <i>int</i> , <i>ermEp*-adpA-vgb</i>                                                                                                                                                                                                                                                                                                                                                    | Group Delin You [12]   |
| pSET152::P <sub>hrdB</sub> G     | <i>aac(3)IV</i> , <i>oriT</i> , <i>int</i> , <i>hrdBp-sanG</i>                                                                                                                                                                                                                                                                                                                                                         | Group Huarong Tan [13] |
| pWHU1288                         | <b>pSET152-hrdBp</b> . 428-bp XbaI + BamHI DNA fragment carrying the promoter of <i>hrdB</i> amplified from pSET152::P <sub>hrdB</sub> G by using primer pair hrdB-pF-XbaI and hrdB-pR-NdeI-BamHI, inserted into the corresponding site of pSET152                                                                                                                                                                     | This work              |
| pWHU1289                         | <b>pSET152-SCO5768p</b> . 287-bp XbaI + BamHI DNA fragment carrying the promoter of SCO5768 amplified from pLXY35 by using primer pair DQ200F and DQ200R, inserted into the corresponding site of pSET152                                                                                                                                                                                                              | This work              |

|          |                                                                                                                                                                                                                                 |           |
|----------|---------------------------------------------------------------------------------------------------------------------------------------------------------------------------------------------------------------------------------|-----------|
| pWHU1290 | <b>pSET152-<i>kasOp</i>*</b> . 113-bp XbaI + BamHI DNA fragment carrying the promoter of <i>kasO</i> amplified from pIB- <i>KasOp</i> * by using primer pair DQ222F and DQ222R, inserted into the corresponding site of pSET152 | This work |
| pWHU1291 | <b>pSET152-SP44</b> . 428-bp XbaI + NdeI DNA fragment carrying the promoter of <i>hrdB</i> of pWHU1288 replaced by 150-bp XbaI + NdeI DNA fragment carrying the promoter of SP44 synthesized directly                           | This work |
| pWHU1292 | <b>pSET152-<i>neo</i></b> . 809-bp DNA fragment carrying <i>neo</i> gene amplified from pHZ1358 by using primer pair DQ195F and DQ195R, digested with EcoRI, inserted into EcoRV+EcoRI site of pSET152                          | This work |
| pWXC4    | <b>pSET152-SP44-<i>neo</i></b> . 795-bp NdeI + EcoRI DNA fragment carrying <i>neo</i> recovered from pLXY36, inserted into the corresponding site of pWHU1291                                                                   | This work |
| pLXY20   | 2121-bp DNA fragment carrying the promoter of <i>ela2</i> * and <i>ela3</i> * amplified from the DNA of <i>Streptomyces</i> sp. 219807 by using primer pair DQ187F and DQ187R, inserted into pEasy-Blunt Zero Vector            | This work |
| pLXY32   | 2274-bp DNA fragment carrying the promoter of <i>ela2</i> and <i>ela1</i> amplified from the DNA of <i>Streptomyces</i> sp. 219807 by using primer pair DQ196F and DQ196R, inserted into pEasy-Blunt Zero Vector                | This work |
| pLXY33   | 1798-bp DNA fragment carrying the promoter of <i>ela4</i> * and <i>ela5</i> * amplified from the DNA of <i>Streptomyces</i> sp. 219807 by using primer pair DQ197F and DQ197R, inserted into pEasy-Blunt Zero Vector            | This work |
| pLXY34   | 2237-bp DNA fragment carrying the promoter of <i>ela9</i> * and <i>ela10</i> * amplified from the DNA of <i>Streptomyces</i> sp. 219807 by using primer pair DQ199F and DQ199R, inserted into pEasy-Blunt Zero Vector           | This work |
| pLXY35   | 463-bp DNA fragment carrying the promoter of SCO5768 amplified from the DNA of <i>S. coelicolor</i> M145 by using primer pair DQ188F and DQ188R, inserted into pEasy-Blunt Zero Vector                                          | This work |
| pLXY36   | 809-bp DNA fragment carrying <i>neo</i> gene amplified from pHZ1358 by using primer pair DQ195F and DQ195R, inserted into pEasy-Blunt Zero Vector                                                                               | This work |
| pLXY37   | <b>pIB139-<i>neo</i></b> . 795-bp NdeI + EcoRI DNA fragment carrying <i>neo</i> recovered from pLXY36, inserted into the corresponding site of pIB139                                                                           | This work |
| pLXY39   | <b>pSET152-<i>hrdBp-neo</i></b> . 795-bp NdeI + EcoRI DNA fragment carrying <i>neo</i> recovered from pLXY36, inserted into the corresponding site of pWHU1288                                                                  | This work |
| pLXY40   | <b>pSET152-SCO5768p-<i>neo</i></b> . 795-bp NdeI + EcoRI DNA fragment carrying <i>neo</i> recovered from pLXY36, inserted into the corresponding site of pWHU1289                                                               | This work |
| pLXY41   | <b>pSET152-<i>kasOp</i>*-<i>neo</i></b> . 795-bp NdeI + EcoRI DNA fragment carrying <i>neo</i> recovered from pLXY36, inserted into the corresponding site of pWHU1290                                                          | This work |

|        |                                                                                                                                                                                                                                                                                                                                          |           |
|--------|------------------------------------------------------------------------------------------------------------------------------------------------------------------------------------------------------------------------------------------------------------------------------------------------------------------------------------------|-----------|
| pLXY44 | <b>pSET152-hrdBp-<i>ela2*</i>-<i>ela3*</i></b> . 1878-bp NdeI + EcoRI DNA fragment carrying <i>ela2*</i> and <i>ela3*</i> amplified from pLXY20 by using primer pair LXY33F and LXY33R, inserted into the corresponding site of pWHU1288                                                                                                 | This work |
| pLXY45 | <b>pSET152-hrdBp-<i>ela2-ela1</i></b> . 1865-bp NdeI + PmeI DNA fragment carrying <i>ela2*</i> and <i>ela3*</i> of pLXY44 replaced by 1939-bp NdeI + PmeI DNA fragment carrying <i>ela2</i> and <i>ela1</i> amplified from pLXY32 by using primer pair LXY34F and LXY34R                                                                 | This work |
| pLXY46 | <b>pSET152-hrdBp-<i>ela7*</i></b> . 1865-bp NdeI + PmeI DNA fragment carrying <i>ela2*</i> and <i>ela3*</i> of pLXY44 replaced by 669-bp NdeI + PmeI DNA fragment carrying <i>ela7*</i> amplified from the DNA of <i>Streptomyces</i> sp. 219807 by using primer pair LXY41F and LXY41R, and primer pair LXY43F and LXY43R (nested PCR)  | This work |
| pLXY47 | <b>pSET152-hrdBp-<i>ela4*-ela5*</i></b> . 1865-bp NdeI + PmeI DNA fragment carrying <i>ela2*</i> and <i>ela3*</i> of pLXY44 replaced by 1675-bp NdeI + PmeI DNA fragment carrying <i>ela4*</i> and <i>ela5*</i> amplified from pLXY33 by using primer pair LXY35F and LXY35R                                                             | This work |
| pLXY48 | <b>pSET152-hrdBp-<i>ela8*</i></b> . 1865-bp NdeI + PmeI DNA fragment carrying <i>ela2*</i> and <i>ela3*</i> of pLXY44 replaced by 966-bp NdeI + PmeI DNA fragment carrying <i>ela8*</i> amplified from the DNA of <i>Streptomyces</i> sp. 219807 by using primer pair LXY30F and LXY30R, and primer pair LXY36F and LXY36R (nested PCR)  | This work |
| pLXY49 | <b>pSET152-hrdBp-<i>ela10*</i></b> . 1865-bp NdeI + PmeI DNA fragment carrying <i>ela2*</i> and <i>ela3*</i> of pLXY44 replaced by 1410-bp NdeI + PmeI DNA fragment carrying <i>ela10*</i> amplified from pLXY34 by using primer pair LXY38F and LXY38R                                                                                  | This work |
| pLXY50 | <b>pSET152-hrdBp-<i>ela9*</i></b> . 1865-bp NdeI + PmeI DNA fragment carrying <i>ela2*</i> and <i>ela3*</i> of pLXY44 replaced by 667-bp NdeI + PmeI DNA fragment carrying partial <i>ela9*</i> recovered from pLXY53 and 331-bp FspI + PmeI fragment carrying partial <i>ela9*</i> recovered from pLXY54                                | This work |
| pLXY51 | <b>pSET152-hrdBp-<i>ela3</i></b> . 1865-bp NdeI + PmeI DNA fragment carrying <i>ela2*</i> and <i>ela3*</i> of pLXY44 replaced by 2877-bp NdeI + PmeI DNA fragment carrying <i>ela3</i> amplified from the DNA of <i>Streptomyces</i> sp. 219807 by using primer pair LXY39F and LXY39R, and primer pair LXY40F and LXY40R (nested PCR)   | This work |
| pLXY52 | <b>pSET152-hrdBp-<i>ela6*</i></b> . 1865-bp NdeI + PmeI DNA fragment carrying <i>ela2*</i> and <i>ela3*</i> of pLXY44 replaced by 1263-bp NdeI + PmeI DNA fragment carrying <i>ela6*</i> amplified from the DNA of <i>Streptomyces</i> sp. 219807 by using primer pair LXY41F and LXY41R, and primer pair LXY42F and LXY42R (nested PCR) | This work |
| pLXY53 | 772-bp DNA fragment carrying partial <i>ela9*</i> amplified from the DNA of <i>Streptomyces</i> sp. 219807 by using primer pair LXY30F and LXY30R, and primer pair LXY37F and LXY37R (nested PCR), inserted into pEasy-Blunt Zero Vector                                                                                                 | This work |

|        |                                                                                                                                                                                                                                                      |           |
|--------|------------------------------------------------------------------------------------------------------------------------------------------------------------------------------------------------------------------------------------------------------|-----------|
| pLXY54 | 573-bp DNA fragment carrying partial <i>ela9</i> * amplified from the DNA of <i>Streptomyces</i> sp. 219807 by using primer pair DQ199F and LXY37R, inserted into pEasy-Blunt Zero Vector                                                            | This work |
| pLXY55 | <b>pSET152-hrdBp-adpA</b> . 1865-bp NdeI + PmeI DNA fragment carrying <i>ela2</i> * and <i>ela3</i> * of pLXY44 replaced by 1229-bp NdeI + PmeI DNA fragment carrying <i>adpA</i> amplified from pJTU3957 by using primer pair adpA-F and adpA-R     | This work |
| pLXY56 | <b>pSET152-hrdBp-vgb</b> . 1865-bp NdeI + PmeI DNA fragment carrying <i>ela2</i> * and <i>ela3</i> * of pLXY44 replaced by 488-bp NdeI + PmeI DNA fragment carrying <i>vgb</i> amplified from pJTU3957 by using primer pair vgb-F and vgb-R          | This work |
| pLXY61 | 5004-bp DNA fragment carrying <i>elaB</i> amplified from the DNA of <i>Streptomyces</i> sp. 219807 by using primer pair LXY44F and LXY44R, inserted into pEasy-Blunt Zero Vector                                                                     | This work |
| pLXY64 | 792-bp DNA fragment carrying <i>ela1</i> * amplified from the DNA of <i>Streptomyces</i> sp. 219807 by using primer pair LXY48F and LXY48R, and primer pair LXY49F and LXY49R (nested PCR), inserted into pEasy-Blunt Zero Vector                    | This work |
| pDQ137 | <b>pSET152-hrdBp-ela1</b> *. 792-bp NdeI + PmeI DNA fragment carrying <i>ela1</i> * recovered from pLXY64, inserted into NdeI+EcoRV site of pWHU1288                                                                                                 | This work |
| pDQ138 | 4947-bp DNA fragment carrying <i>elaC</i> amplified from the DNA of <i>Streptomyces</i> sp. 219807 by using primer pair LXY45F and LXY45R, inserted into pEasy-Blunt Zero Vector                                                                     | This work |
| pDQ139 | <b>pSET152-hrdBp-elaC</b> . 4947-bp NdeI + PmeI DNA fragment carrying <i>elaC</i> recovered from pDQ138, inserted into NdeI+EcoRV site of pWHU1288                                                                                                   | This work |
| pNN1   | <b>pSET152-hrdBp-elaB</b> . 1865-bp NdeI + PmeI DNA fragment carrying <i>ela2</i> * and <i>ela3</i> * of pLXY44 replaced by 5004-bp NdeI + PmeI DNA fragment carrying <i>elaB</i> recovered from pLXY61                                              | This work |
| pMX5   | 1467-bp NdeI + EcoRI DNA fragment carrying <i>azl4</i> amplified from the DNA of <i>Streptomyces</i> sp. 211726 by using primer pair DQ201F and DQ201R, and primer pair MX01F and MX01R (nested PCR), inserted into the corresponding site of pIB139 | This work |
| pMX6   | 1058-bp NdeI + EcoRI DNA fragment carrying <i>azl5</i> amplified from the DNA of <i>Streptomyces</i> sp. 211726 by using primer pair DQ201F and DQ201R, and primer pair MX02F and MX02R (nested PCR), inserted into the corresponding site of pIB139 | This work |
| pMX7   | 404-bp NdeI + EcoRI DNA fragment carrying <i>azl8</i> amplified from the DNA of <i>Streptomyces</i> sp. 211726 by using primer pair DQ203F and DQ203R, and primer pair MX04F and MX04R (nested PCR), inserted into the corresponding site of pIB139  | This work |
| pMX8   | 812-bp NdeI + EcoRI DNA fragment carrying <i>azl10</i> amplified from the DNA of <i>Streptomyces</i> sp. 211726 by using primer pair DQ204F and DQ204R, and primer pair MX05F and MX05R (nested PCR), inserted into the corresponding site of pIB139 | This work |

|        |                                                                                                                                                                                                                                                       |           |
|--------|-------------------------------------------------------------------------------------------------------------------------------------------------------------------------------------------------------------------------------------------------------|-----------|
| pMX10  | 829-bp NdeI + EcoRI DNA fragment carrying <i>azl13</i> amplified from the DNA of <i>Streptomyces</i> sp. 211726 by using primer pair DQ207F and DQ207R, and primer pair MX08F and MX08R (nested PCR), inserted into the corresponding site of pIB139  | This work |
| pMX11  | 1470-bp NdeI + EcoRI DNA fragment carrying <i>azl14</i> amplified from the DNA of <i>Streptomyces</i> sp. 211726 by using primer pair DQ207F and DQ207R, and primer pair MX09F and MX09R (nested PCR), inserted into the corresponding site of pIB139 | This work |
| pMX12  | 827-bp DNA fragment carrying <i>azl12</i> amplified from the DNA of <i>Streptomyces</i> sp. 211726 by using primer pair DQ206F and DQ206R, and primer pair MX07F and MX07R (nested PCR), inserted into pEasy-Blunt Zero Vector                        | This work |
| pMX13  | 633-bp DNA fragment carrying <i>azl6</i> amplified from the DNA of <i>Streptomyces</i> sp. 211726 by using primer pair DQ202F and DQ202R, and primer pair MX03F and MX03R (nested PCR), inserted into pEasy-Blunt Zero Vector                         | This work |
| pMX16  | 1308-bp DNA fragment carrying <i>azl11</i> amplified from the DNA of <i>Streptomyces</i> sp. 211726 by using primer pair DQ205F and DQ205R, and primer pair MX06F and MX06R2 (nested PCR), inserted into pEasy-Blunt Zero Vector.                     | This work |
| pMX301 | <b>pSET152-hrdBp-azl4.</b> 1467-bp NdeI + EcoRI DNA fragment carrying <i>azl4</i> recovered from pMX5, inserted into the corresponding site of pWHU1288                                                                                               | This work |
| pMX302 | <b>pSET152-hrdBp-azl5.</b> 1058-bp NdeI + EcoRI DNA fragment carrying <i>azl5</i> recovered from pMX6, inserted into the corresponding site of pWHU1288                                                                                               | This work |
| pMX303 | <b>pSET152-hrdBp-azl6.</b> 633-bp NdeI + EcoRI DNA fragment carrying <i>azl6</i> recovered from pMX13, inserted into the corresponding site of pWHU1288                                                                                               | This work |
| pMX304 | <b>pSET152-hrdBp-azl8.</b> 404-bp NdeI + EcoRI DNA fragment carrying <i>azl8</i> recovered from pMX7, inserted into the corresponding site of pWHU1288                                                                                                | This work |
| pMX305 | <b>pSET152-hrdBp-azl10.</b> 812-bp NdeI + EcoRI DNA fragment carrying <i>azl10</i> recovered from pMX8, inserted into the corresponding site of pWHU1288                                                                                              | This work |
| pMX306 | <b>pSET152-hrdBp-azl11.</b> 1308-bp NdeI + EcoRI DNA fragment carrying <i>azl11</i> recovered from pMX16, inserted into the corresponding site of pWHU1288                                                                                            | This work |
| pMX307 | <b>pSET152-hrdBp-azl12.</b> 827-bp NdeI + EcoRI DNA fragment carrying <i>azl12</i> recovered from pMX12, inserted into the corresponding site of pWHU1288                                                                                             | This work |
| pMX308 | <b>pSET152-hrdBp-azl13.</b> 829-bp NdeI + EcoRI DNA fragment carrying <i>azl13</i> recovered from pMX10, inserted into the corresponding site of pWHU1288                                                                                             | This work |
| pMX309 | <b>pSET152-hrdBp-azl14.</b> 1470-bp NdeI + EcoRI DNA fragment carrying <i>azl14</i> recovered from pMX11, inserted into the corresponding site of pWHU1288                                                                                            | This work |

|        |                                                                                                                                                                                                                                                                       |           |
|--------|-----------------------------------------------------------------------------------------------------------------------------------------------------------------------------------------------------------------------------------------------------------------------|-----------|
| pMX401 | <b>pSET152-SP44-<i>ela8</i>*</b> . 966-bp NdeI + EcoRI DNA fragment carrying <i>ela8</i> * recovered from pLXY48, inserted into the corresponding site of pWHU1291                                                                                                    |           |
| pMX402 | 2877-bp DNA fragment carrying <i>ela3</i> amplified from the DNA of <i>Streptomyces</i> sp. 219807 by using primer pair LXY39F and LXY39R, and primer pair LXY40F and orf8003R (nested PCR), inserted into pESI-Blunt Zero Vector                                     |           |
| pMX403 | <b>pSET152-SP44-<i>azl6</i></b> . 633-bp NdeI + EcoRI DNA fragment carrying <i>azl6</i> recovered from pMX13, inserted into the corresponding site of pWHU1291                                                                                                        |           |
| pMX404 | <b>pSET152-SP44-<i>azl4</i></b> . 1467-bp NdeI + EcoRI DNA fragment carrying <i>azl4</i> recovered from pMX301, inserted into the corresponding site of pWHU1291                                                                                                      |           |
| pMX405 | <b>pSET152-SP44-<i>ela3</i>*</b> . 2877-bp NdeI + EcoRV DNA fragment carrying <i>ela3</i> recovered from pMX402, inserted into the corresponding site of pWHU1291                                                                                                     |           |
| pYQ1   | <b>pSET152-<i>kasOp</i>*-<i>arm1</i></b> . 1281-bp NdeI + EcoRI DNA fragment carrying <i>arm1</i> amplified from the DNA of <i>S. armeniacus</i> DSM 43125 by using primer pair LY2F and LY2R, inserted into the corresponding site of pWHU1290                       | This work |
| pYQ2   | <b>pSET152-<i>kasOp</i>*-<i>arm24</i></b> . 891-bp NdeI + EcoRI DNA fragment carrying <i>arm24</i> amplified from the DNA of <i>S. armeniacus</i> DSM 43125 by using primer pair LY3F and LY3R, inserted into the corresponding site of pWHU1290                      | This work |
| pYQ3   | <b>pSET152-<i>kasOp</i>*-<i>arm25</i></b> . 615-bp BamHI + EcoRI DNA fragment carrying <i>arm25</i> amplified from the DNA of <i>S. armeniacus</i> DSM 43125 by using primer pair LY4F and LY4R, inserted into the corresponding site of pWHU1290                     | This work |
| pZQ5   | 4505-bp DNA fragment carrying part of <i>arm6</i> amplified from the DNA of <i>S. armeniacus</i> DSM 43125 by using primer pair ZQ5F and ZQ5R, inserted into pESI-Blunt simple vector                                                                                 | This work |
| pZQ6   | 4956-bp DNA fragment carrying part of <i>arm6</i> amplified from the DNA of <i>S. armeniacus</i> DSM 43125 by using primer pair ZQ6F and ZQ6R, inserted into pESI-Blunt simple vector                                                                                 | This work |
| pZQ7   | 4397-bp DNA fragment carrying <i>arm7</i> amplified from the DNA of <i>S. armeniacus</i> DSM 43125 by using primer pair ZQ7F and ZQ7R, inserted into pESI-Blunt simple vector                                                                                         | This work |
| pZQ11  | <b>pSET152-<i>kasOp</i>*-<i>arm6</i></b> . 4220-bp NdeI + FspI DNA fragment carrying part of <i>arm6</i> recovered from pZQ5 and 4684-bp FspI + EcoRI DNA fragment carrying part of <i>arm6</i> recovered from pZQ6, inserted into the corresponding site of pWHU1290 | This work |
| pZQ12  | <b>pSET152-<i>kasOp</i>*-<i>arm7</i></b> . 4398-bp NdeI + EcoRI DNA fragment carrying <i>arm7</i> recovered from pZQ7, inserted into the corresponding site of pWHU1290                                                                                               | This work |

Table S2. Primers used in this study

| Primer name | Sequence (5'-3'), (restriction enzyme site underlined) | Purpose                       |
|-------------|--------------------------------------------------------|-------------------------------|
| adpA-F      | GGCTTAGCC <u>CATATG</u> AGCCAC (NdeI)                  | <i>adpA</i>                   |
| adpA-R      | GTGGCCGTTTAAACG <u>ACTAGT</u> CACGGCGCGC (PmeI, SpeI)  | <i>adpA</i>                   |
| DQ187F      | CCCGACGACCCATCGACTGA                                   | <i>ela2*</i> + <i>ela3*</i>   |
| DQ187R      | CGTGATTGCGGTATTCCTTGC                                  | <i>ela2*</i> + <i>ela3*</i>   |
| DQ188F      | ATGTAGTCCCGCAACAACG                                    | <i>SCO5768p</i>               |
| DQ188R      | CCGAATTGCCGTTCAATCTGT                                  | <i>SCO5768p</i>               |
| DQ195F      | GTTTCATATGATTGAACAAGATGGA (NdeI)                       | <i>neo</i>                    |
| DQ195R      | AGTGAATTCAGAAGAACTCGTCAAG (EcoRI)                      | <i>neo</i>                    |
| DQ196F      | CCAGCCTGTTCAACATCA                                     | <i>ela2</i> + <i>ela1</i>     |
| DQ196R      | GGGAGTTCTCCGACATCACGA                                  | <i>ela2</i> + <i>ela1</i>     |
| DQ197F      | AGAAACGAGCGAGGAGGAAC                                   | <i>ela4*</i> + <i>ela5*</i>   |
| DQ197R      | GCCGTGGACAGAAACAGCAGA                                  | <i>ela4*</i> + <i>ela5*</i>   |
| DQ199F      | CAGGCGATGGAGACGCTGAC                                   | <i>ela9*</i> + <i>ela10*</i>  |
| DQ199R      | GGGTCCTTGTCCTTGGTGGC                                   | <i>ela9*</i> + <i>ela10*</i>  |
| DQ200F      | GATGGATCC <u>CATATG</u> CGTCCCCT (BamHI, NdeI)         | <i>SCO5768p</i>               |
| DQ200R      | TTCTCTAGAGGGTTCCAACCGGT (XbaI)                         | <i>SCO5768p</i>               |
| DQ201F      | AAGAAAGGCTCAGTGAAACCCGA                                | <i>azl 4</i> + <i>azl 5</i>   |
| DQ201R      | CCTTCCTCCGTGCCATACCG                                   | <i>azl 4</i> + <i>azl 5</i>   |
| DQ202F      | CGCACCGTGGACAACCTCG                                    | <i>azl 6</i>                  |
| DQ202R      | AGGGTTTCGGGACTGAATGGT                                  | <i>azl 6</i>                  |
| DQ203F      | CTTGTGGTGACTCGGGAAGT                                   | <i>azl 8</i>                  |
| DQ203R      | TGGCGAAGCTGACCGTCTA                                    | <i>azl 8</i>                  |
| DQ204F      | CGGCTACAGTGCGAGGGAT                                    | <i>azl 10</i>                 |
| DQ204R      | GGAGCACGACGAGTGGAAGA                                   | <i>azl 10</i>                 |
| DQ205F      | ACTTCTTCCACTCGTCGTGCTCC                                | <i>azl 11</i>                 |
| DQ205R      | TGTCCGTGGCCGAATCTGTG                                   | <i>azl 11</i>                 |
| DQ206F      | CCATGCGATCTGTGGAGTCAGC                                 | <i>azl 12</i>                 |
| DQ206R      | CAGTGCCTTCGACAGTGGGTGT                                 | <i>azl 12</i>                 |
| DQ207F      | GTTCTTGGGTGCGCATTC                                     | <i>azl 13</i> + <i>azl 14</i> |
| DQ207R      | CCGTCCAACCCGTACCAGAG                                   | <i>azl 13</i> + <i>azl 14</i> |
| DQ222F      | TCTAGTTCTAGATGTTACATTCTGA (XbaI)                       | <i>kasOp*</i>                 |
| DQ222R      | TAGAGGATCCCCAACATATGAACTC (BamHI, NdeI)                | <i>kasOp*</i>                 |



|                    |                                                                   |                      |
|--------------------|-------------------------------------------------------------------|----------------------|
| hrdB-pF-XbaI       | AATTTCTAGAACGCCTTCCGCCGGAACG (XbaI)                               | <i>hrdBp</i>         |
| hrdB-pR-NdeI-BamHI | AATTGGATCC CATATGCAAACCTCTCGGAACGTTG (BamHI, NdeI)                | <i>hrdBp</i>         |
| LXY30F             | GCCAATACATATGCCAAGTGCTCAGGCTTATCG (NdeI)                          | <i>ela8*</i>         |
| LXY30R             | CAAGGTACCCGTCGCACAGCTTCTCGTAC (KpnI)                              | <i>ela8*</i>         |
| LXY33F             | GGAATTCCATATGCGCATCCTTTTCGCG (NdeI)                               | <i>ela2* + ela3*</i> |
| LXY33R             | GGAATTTCGTGGCCGTTTAAACGACTAGTTCAGCCGCGCCGGGCG (EcoRI, PmeI, SpeI) | <i>ela2* + ela3*</i> |
| LXY34F             | GGAATTCCATATGCCCAACCCTGATTAACC (NdeI)                             | <i>ela2 + ela1</i>   |
| LXY34R             | GTGGCCGTTTAAACGACTAGTTCACATCTTCTTGAGCGGTT (PmeI, SpeI)            | <i>ela2 + ela1</i>   |
| LXY35F             | GGAATTCCATATGCCGCTGATCGAGGTCAG (NdeI)                             | <i>ela4* + ela5*</i> |
| LXY35R             | GTGGCCGTTTAAACGACTAGTTCCTCCAGCGGAACAGCT (PmeI, SpeI)              | <i>ela4* + ela5*</i> |
| LXY36F             | GGAATTCCATATGGGCCACATCCGAGATCG (NdeI)                             | <i>ela8*</i>         |
| LXY36R             | GTGGCCGTTTAAACGACTAGTTCAGTGTCCTTCGGTACGGG (PmeI, SpeI)            | <i>ela8*</i>         |
| LXY37F             | GGAATTCCATATGCAGTACAACATCTCGG (NdeI)                              | <i>ela9*</i>         |
| LXY37R             | GTGGCCGTTTAAACGACTAGTTCACACGCCACGCCTCCG (PmeI, SpeI)              | <i>ela9*</i>         |
| LXY38F             | GGAATTCCATATGGTGGTGAGCACGCTTCAGGA (NdeI)                          | <i>ela10*</i>        |
| LXY38R             | GTGGCCGTTTAAACGACTAGTCTATACGGCCAGGGAGTGCA (PmeI, SpeI)            | <i>ela10*</i>        |
| LXY39F             | TCCGCTTTATGGCATGAGAA                                              | <i>ela3</i>          |
| LXY39R             | GGTTTGTTGTAGACGGGAAGG                                             | <i>ela3</i>          |
| LXY40F             | GGAATTCCATATGGTGTTCATCGGCCAG (NdeI)                               | <i>ela3</i>          |
| LXY40R             | GTGGCCGTTTAAACGACTAGTTCAGGCGATTCGTCCAAC (PmeI, SpeI)              | <i>ela3</i>          |
| LXY41F             | CCGCCTTCGACAACAAAC                                                | <i>ela6* + ela7*</i> |
| LXY41R             | CAACGAGCCCAGATGAAAC                                               | <i>ela6* + ela7*</i> |
| LXY42F             | GGAATTCCATATGGTGAGCGCGTCCAAGGACGA (NdeI)                          | <i>ela6*</i>         |
| LXY42R             | GTGGCCGTTTAAACGACTAGTTCATGCAACGGCTTCCTGGG (PmeI, SpeI)            | <i>ela6*</i>         |
| LXY43F             | GGAATTCCATATGAGCGGAAACAACCATGG (NdeI)                             | <i>ela7*</i>         |
| LXY43R             | GTGGCCGTTTAAACGACTAGTTCATTCTGAATAGATGTCGTT (PmeI, SpeI)           | <i>ela7*</i>         |
| LXY44F             | GGGCTTCCATATGGCGAACGAGAACGAA (NdeI)                               | <i>elaB</i>          |
| LXY44R             | CCGGGGGTTTAAACGACTAGTTCATGGGGCCGTCAGATC (PmeI, SpeI)              | <i>elaB</i>          |
| LXY45F             | GCTGACGCATATGGACAACGAGAAGAAG (NdeI)                               | <i>elaC</i>          |
| LXY45R             | CAGCTCGTTTAAACGACTAGTTCAGAGGTCGTTCTTGTC (PmeI, SpeI)              | <i>elaC</i>          |
| LXY48F             | CCCCGCATCAGATAAGGAA                                               | <i>ela1*</i>         |
| LXY48R             | GGTCTGGTACGCGAACATCA                                              | <i>ela1*</i>         |
| LXY49F             | TAAGGACATATGACCATGGCGTTGCC (NdeI)                                 | <i>ela1*</i>         |
| LXY49R             | TGCGCAGTTTAAACGACTAGTTCAGTCGATGGGTCGTCG (PmeI, SpeI)              | <i>ela1*</i>         |

|          |                                                          |               |
|----------|----------------------------------------------------------|---------------|
| LY2F     | CGGAATTC <u>ACTAGTTC</u> ACATGGCCTGGGACTC (EcoRI, SpeI)  | <i>arm1</i>   |
| LY2R     | GGAATTC <u>CATATG</u> ACAGGCAGTCCGTGGA (NdeI)            | <i>arm1</i>   |
| LY3F     | CGGAATTC <u>ACTAGTTC</u> AGGCGTGCAGCCG (EcoRI, SpeI)     | <i>arm24</i>  |
| LY3R     | GGAATTC <u>CATATG</u> GTGGAGATCAATGTCCTGGGG (NdeI)       | <i>arm24</i>  |
| LY4F     | CGGAATTC <u>ACTAGTTC</u> AGGCAAGCCATCCGGCC (EcoRI, SpeI) | <i>arm25</i>  |
| LY4R     | CGG <u>GATCC</u> ATGCCCCGAAGTGGGGTGC (BamHI)             | <i>arm25</i>  |
| MX01F    | GTGAAAC <u>CATATG</u> ACCGCAAAGGTCTTT (NdeI)             | <i>azl 4</i>  |
| MX01R    | CTGAATTC <u>TCTAGAG</u> GTCCGTCATGCCTT (EcoRI)           | <i>azl 4</i>  |
| MX02F    | GAGCGAA <u>CATATG</u> ACGGACCCGCAGAACA (NdeI)            | <i>azl 5</i>  |
| MX02R    | GGAATTC <u>TCTAGAT</u> CACCGCCTCGCCCG (EcoRI)            | <i>azl 5</i>  |
| MX03F    | GCGTGCC <u>CATATG</u> GCACGGAGGAAGGAG (NdeI)             | <i>azl 6</i>  |
| MX03R    | GCGAATTC <u>TCTAGAT</u> CAGTCGGTGACGGT (EcoRI)           | <i>azl 6</i>  |
| MX04F    | GAGTGAC <u>CATATG</u> GGGACCAAGCAGTAC (NdeI)             | <i>azl 8</i>  |
| MX04R    | AGAATTC <u>TCTAGAT</u> CAGGCGTCGAAGCGG (EcoRI)           | <i>azl 8</i>  |
| MX05F    | AGGATTC <u>CATATG</u> ACCTCCACACCACAC (NdeI)             | <i>azl 10</i> |
| MX05R    | CGAATTC <u>TCTAGAT</u> CAGCAGCCGATGCG (EcoRI)            | <i>azl 10</i> |
| MX06F    | CCGGAGC <u>CATATG</u> GTGACCAACCGCCCC (NdeI)             | <i>azl 11</i> |
| MX06R2   | CCGAATTC <u>ACTAGTC</u> GCAGCAGACGCC (EcoRI)             | <i>azl 11</i> |
| MX07F    | CCGTACG <u>CATATG</u> GTGCGGAGGGC (NdeI)                 | <i>azl 12</i> |
| MX07R    | CGAATTC <u>TCTAGAT</u> CAGCCGTCCTCGC (EcoRI)             | <i>azl 12</i> |
| MX08F    | CGAAGGCACATATGAAGATCTCCGGACT (NdeI)                      | <i>azl 13</i> |
| MX08R    | CAGAATTC <u>TCTAGAT</u> CAGCATGACGGGTC (EcoRI)           | <i>azl 13</i> |
| MX09F    | AAGGACCC <u>CATATG</u> CTGACCGACCC (NdeI)                | <i>azl 14</i> |
| MX09R    | CGAATTC <u>TCTAGAT</u> CATTGGGTCTCACCC (EcoRI)           | <i>azl 14</i> |
| Orf8003R | CGTGATATCTCAGGCGATTTCGTCCAAC (EcoRV)                     | <i>ela3</i>   |
| vgb-F    | GGAGAAC <u>CATATG</u> CTGGAAC (NdeI)                     | <i>vgb</i>    |
| vgb-R    | GTGGCCGTTTAAACG <u>ACTAGTTC</u> ACTCGAAC (PmeI, SpeI)    | <i>vgb</i>    |
| ZQ5F     | GGACATAT <u>G</u> GTCTCCAGTGACG (NdeI)                   | <i>arm6</i>   |
| ZQ5R     | CACGGGATGTCAGGGCTC                                       | <i>arm6</i>   |
| ZQ6F     | CGGCGTCAACCTCATCCTCAG                                    | <i>arm6</i>   |
| ZQ6R     | TCGAATTCAGCGCCTGTACGAG (EcoRI)                           | <i>arm6</i>   |
| ZQ7F     | GGACATATGACGTCGCCGGTAC (NdeI)                            | <i>arm7</i>   |
| ZQ7R     | CGCGAATTCATCGGTTACCT (EcoRI)                             | <i>arm7</i>   |

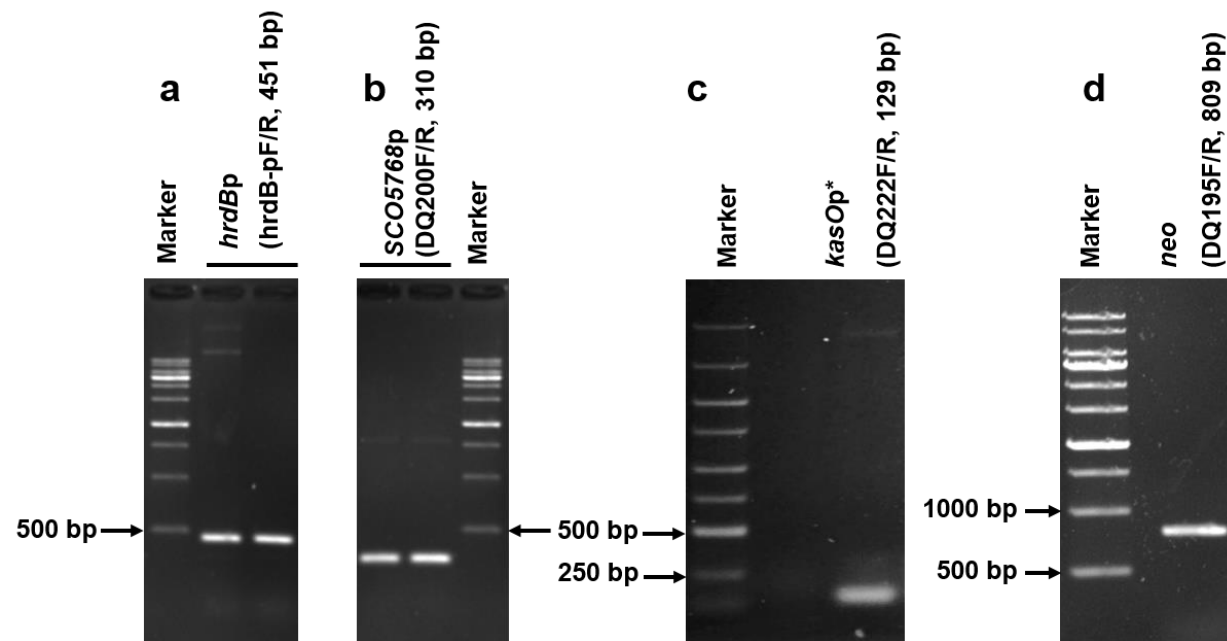

Figure S1 Agarose gel electrophoresis analysis of PCR products. Gels were stained with ethidium bromide and photographed under UV light at 305 nm. a, *hrdBp*; b, *SCO5768p*; c, *kasOp\**; d, *neo*.

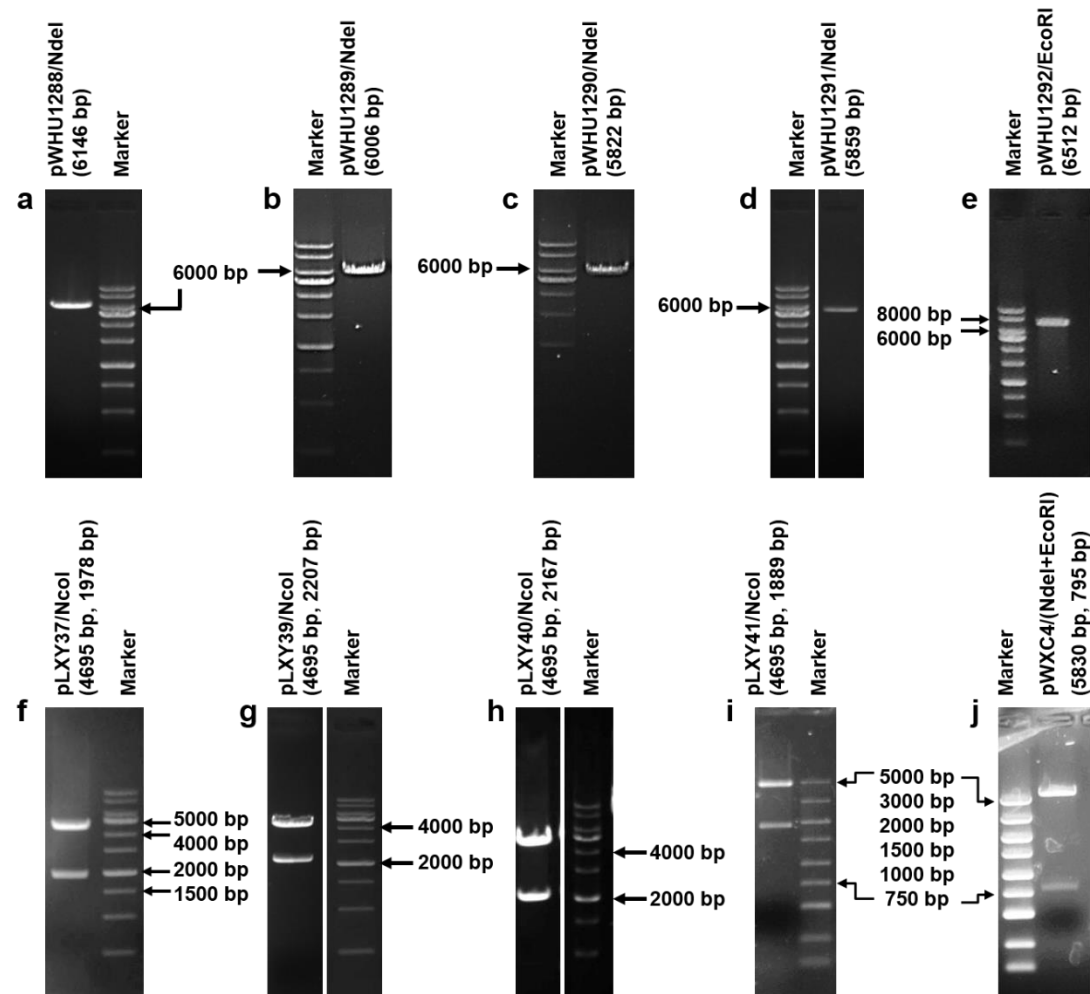

Figure S2 Agarose gel electrophoresis analysis of recombinant plasmids digested with restriction enzymes. Gels were stained with ethidium bromide and photographed under UV light at 305 nm. All recombinant plasmids were sequenced by TsingKe Inc., Wuhan, China. a, pWHU1288; b, pWHU1289; c, pWHU1290; d, pWHU1291; e, pWHU1292; f, pLXY37; g, pLXY39; h, pLXY40; i, pLXY41; j, pWXC4.

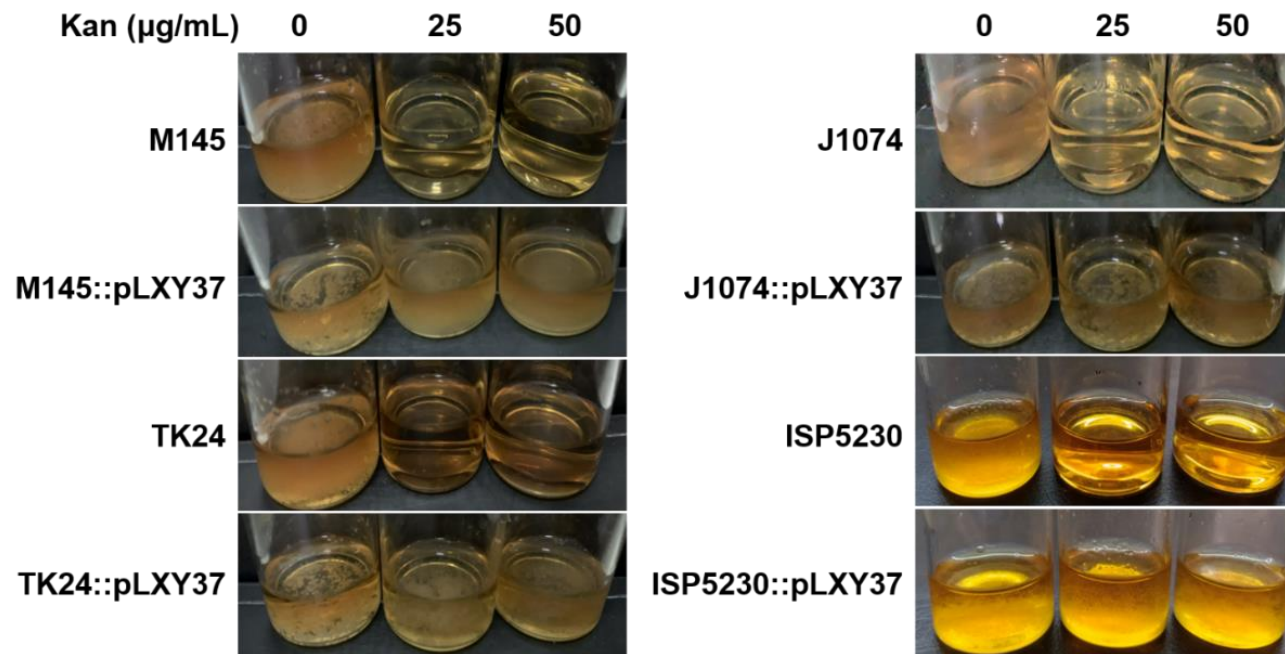

Figure S3 Determination of the activity of kanamycin resistance gene *neo* controlled by the promoter *ermEp\** in different *Streptomyces* strains. The wild type strains including *S. coelicolor* M145, *S. lividans* TK24, *S. albus* J1074 and *S. venezuelae* ISP5230 were controls. The corresponding recombinant strains harboring pLXY37 inoculated in the liquid TSBY medium with different concentrations of kanamycin and cultured at 30 °C and 200 rpm for 48 h.

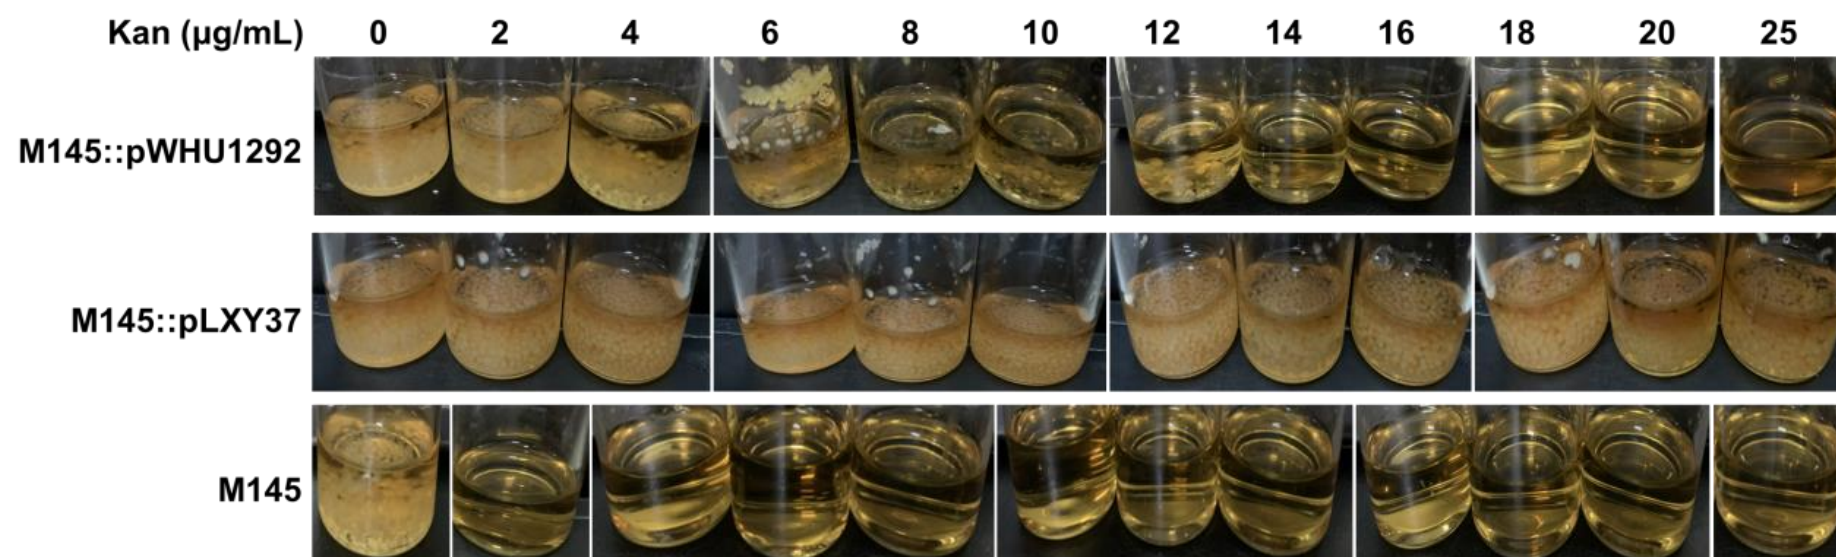

Figure S4 Determination of the activity of promoterless kanamycin resistance gene *neo* in *S. coelicolor* M145::pWHU1292. *S. coelicolor* M145 and M145::pLXY37 were controls. These strains were inoculated in TSBY liquid medium containing different concentrations of kanamycin and cultured at 30°C and 200 rpm for 48 h.

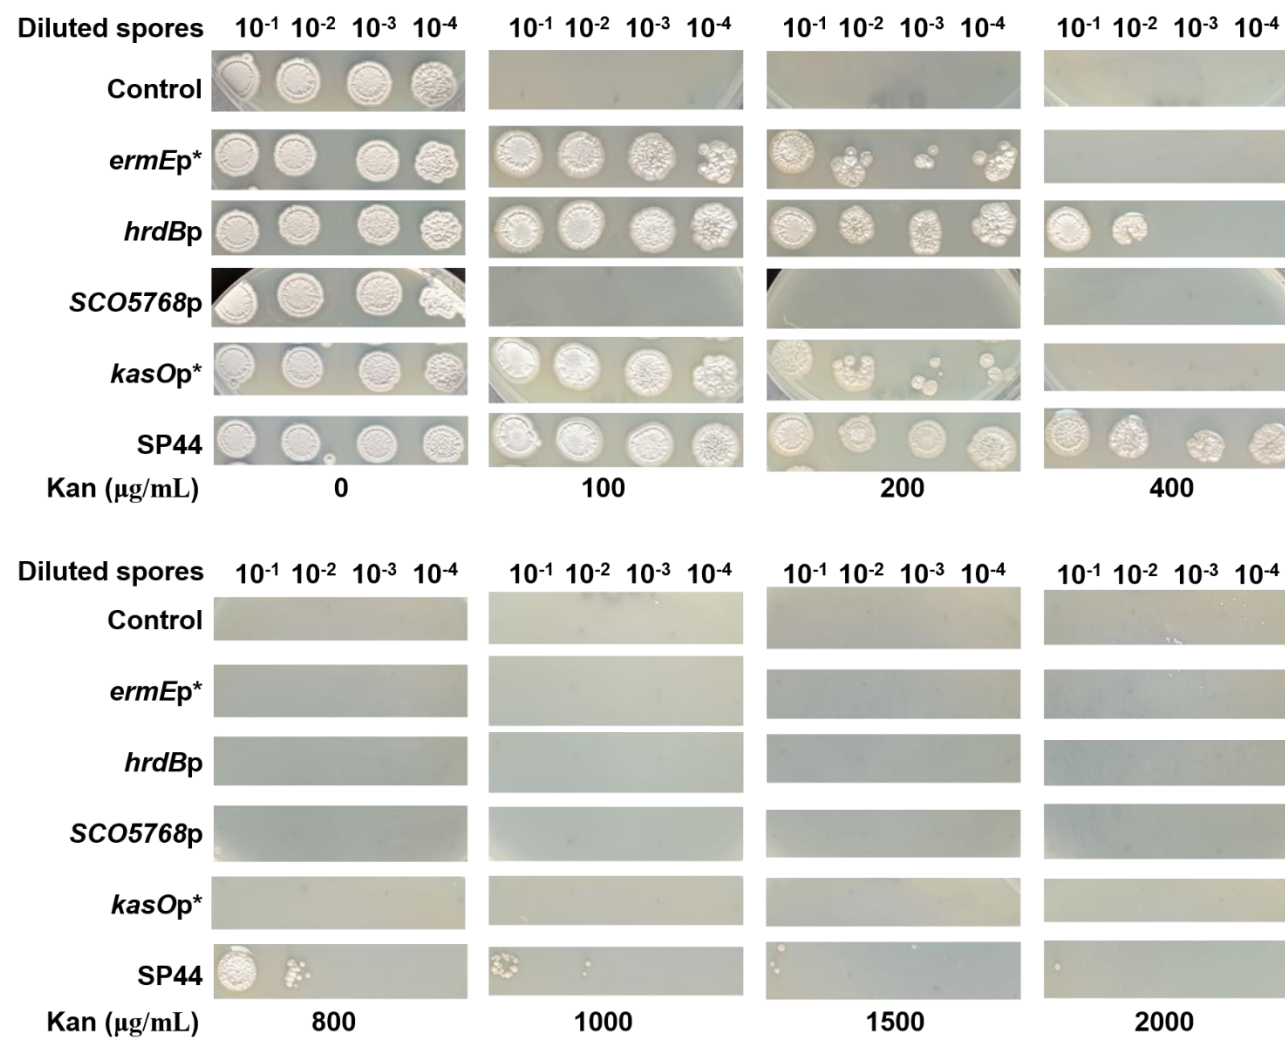

Figures S5: Determination of promoter activity by using *neo* as a reporter gene in *S. coelicolor* M145. (SFM, 30°C, Day8)

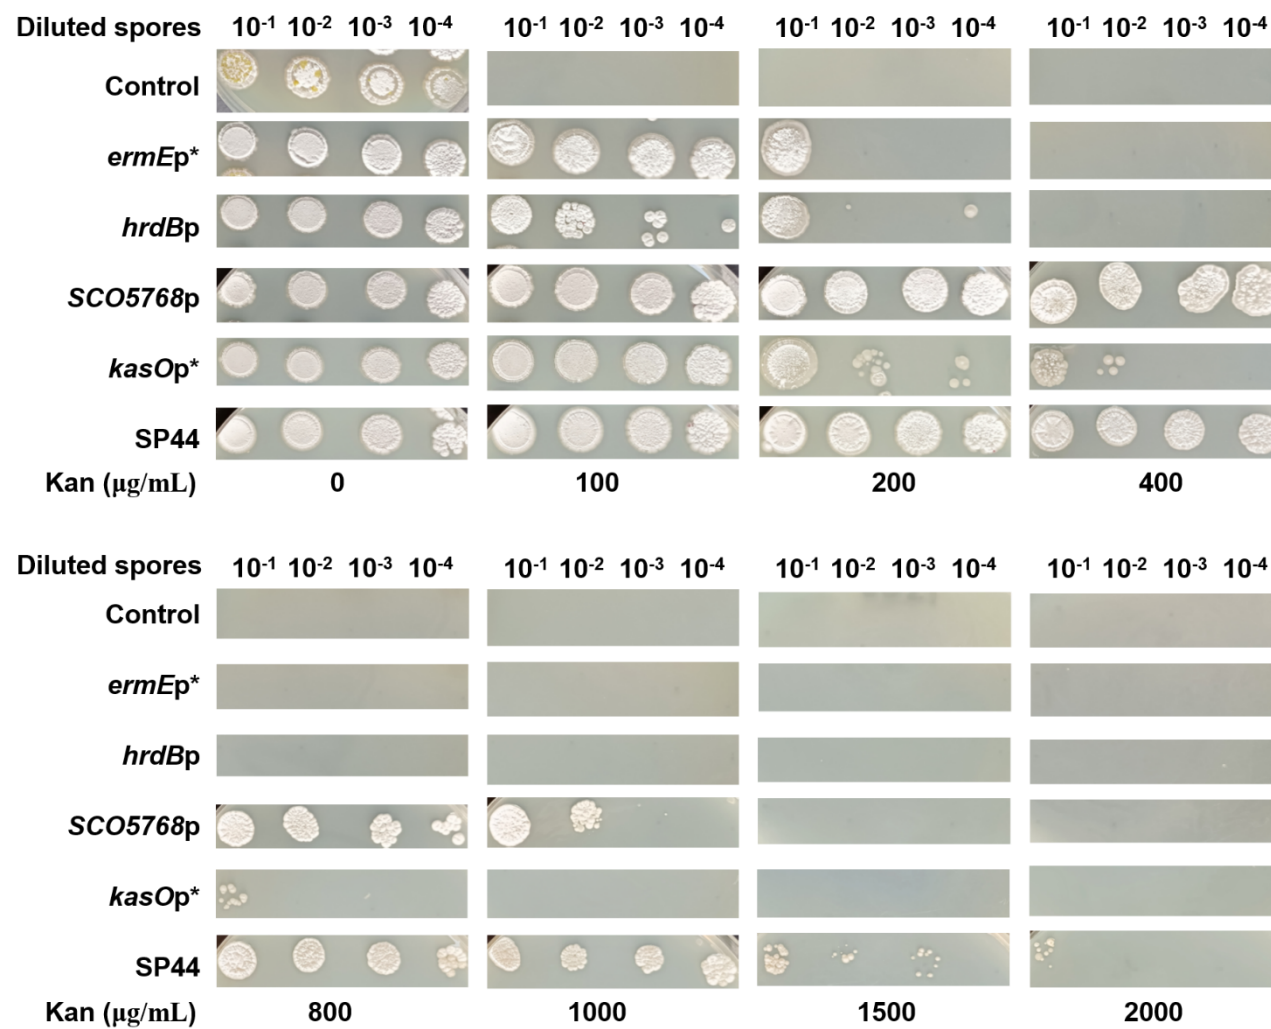

Figures S6: Determination of promoter activity by using *neo* as a reporter gene in *S. lividans* TK24 (SFM, 30°C, Day8)



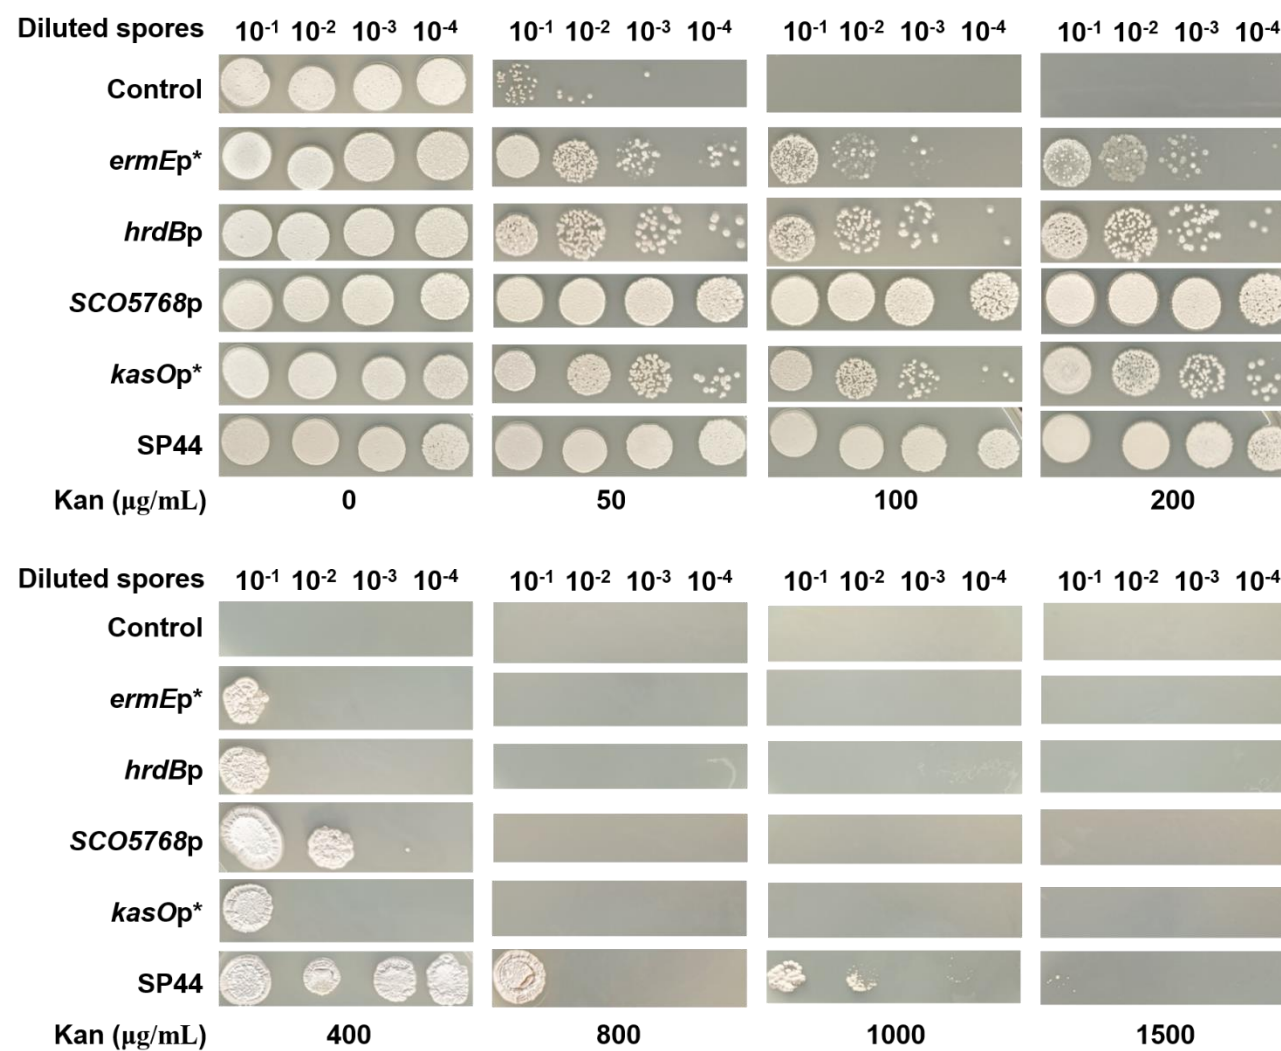

Figures S7: Determination of promoter activity by using *neo* as a reporter gene in *S. olivaceus* CGMCC 4.1369 (SFM, 30°C, Day8)

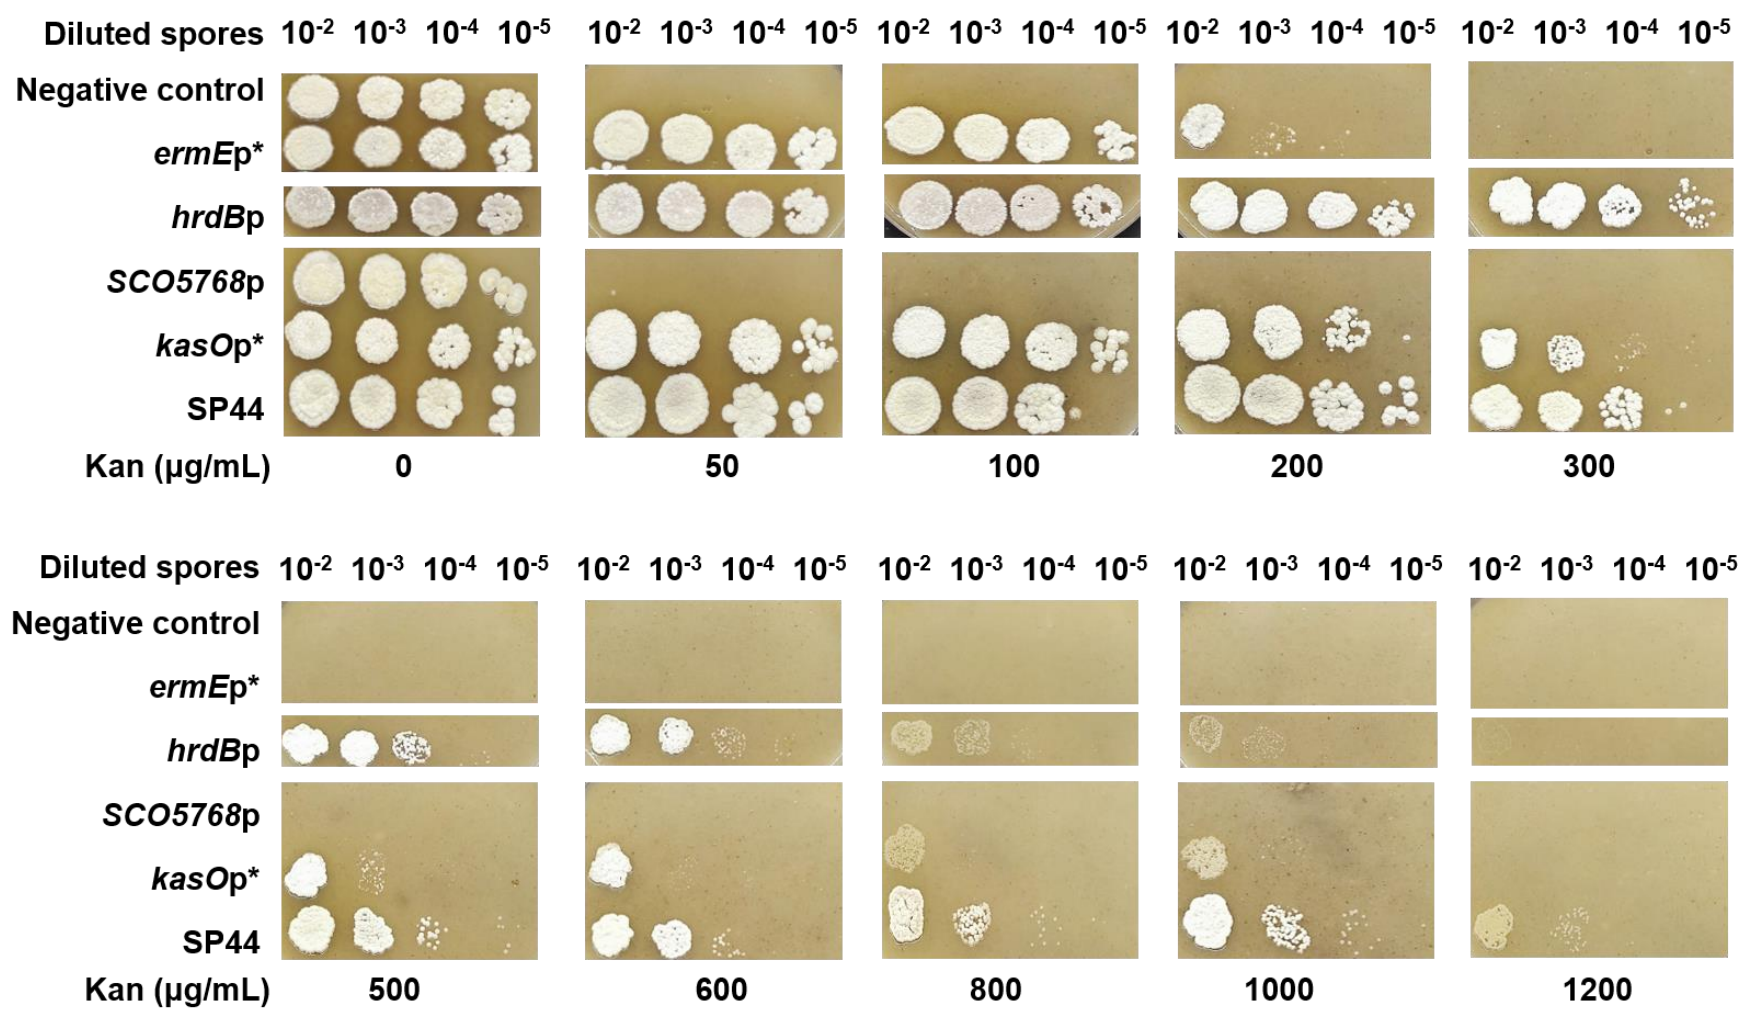

Figures S8: Determination of promoter activity by using *neo* as a reporter gene in *Streptomyces* sp. 219807 (FM, 30°C, Day 7)

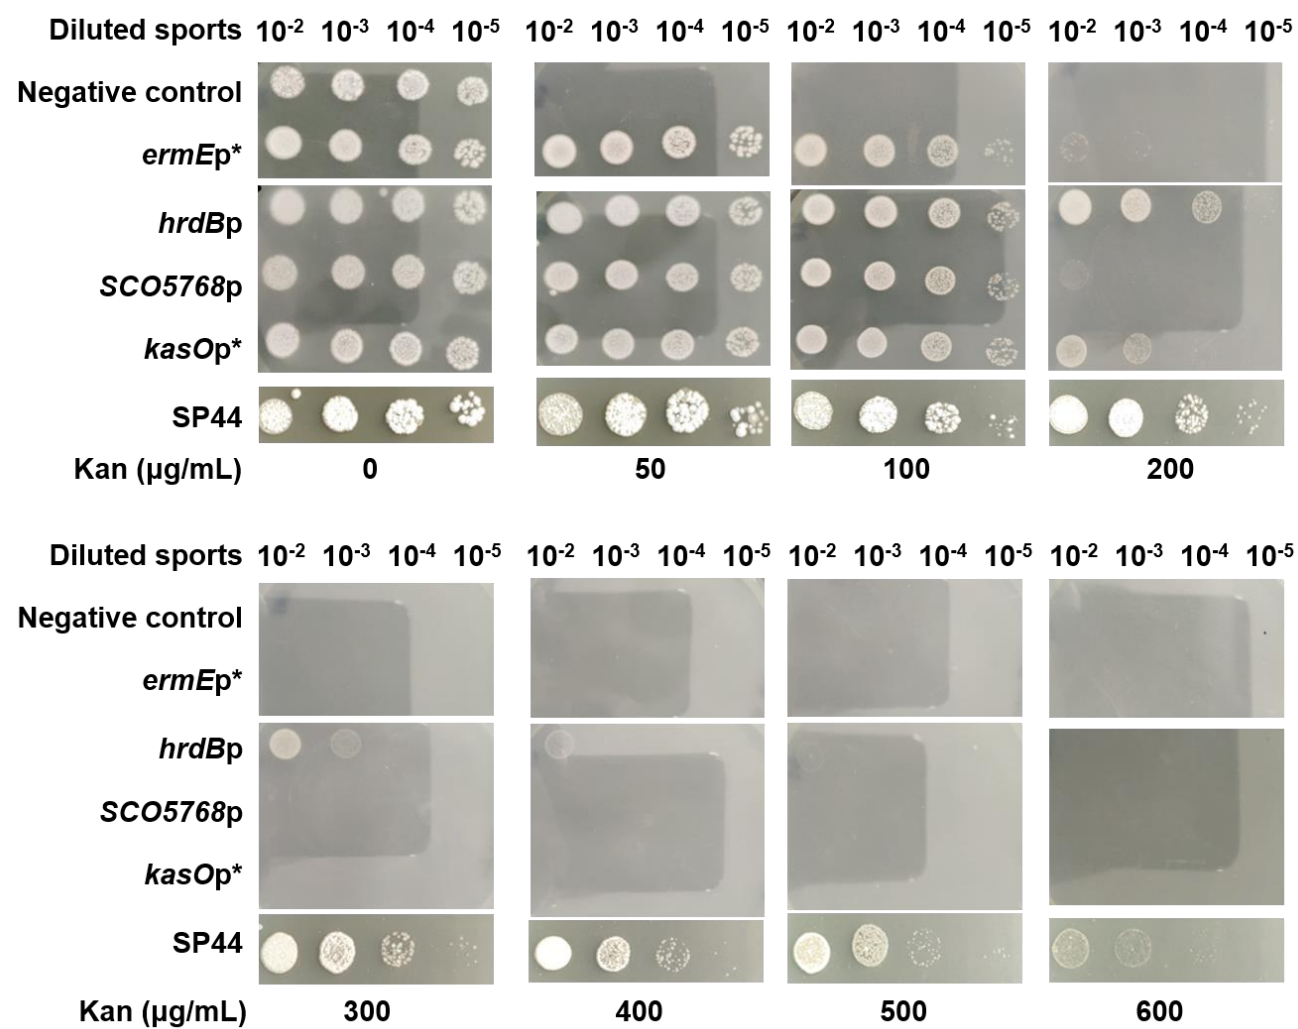

Figures S9: Determination of promoter activity by using *neo* as a reporter gene in *Streptomyces* sp. 211726 (FM, 30°C, Day 6)

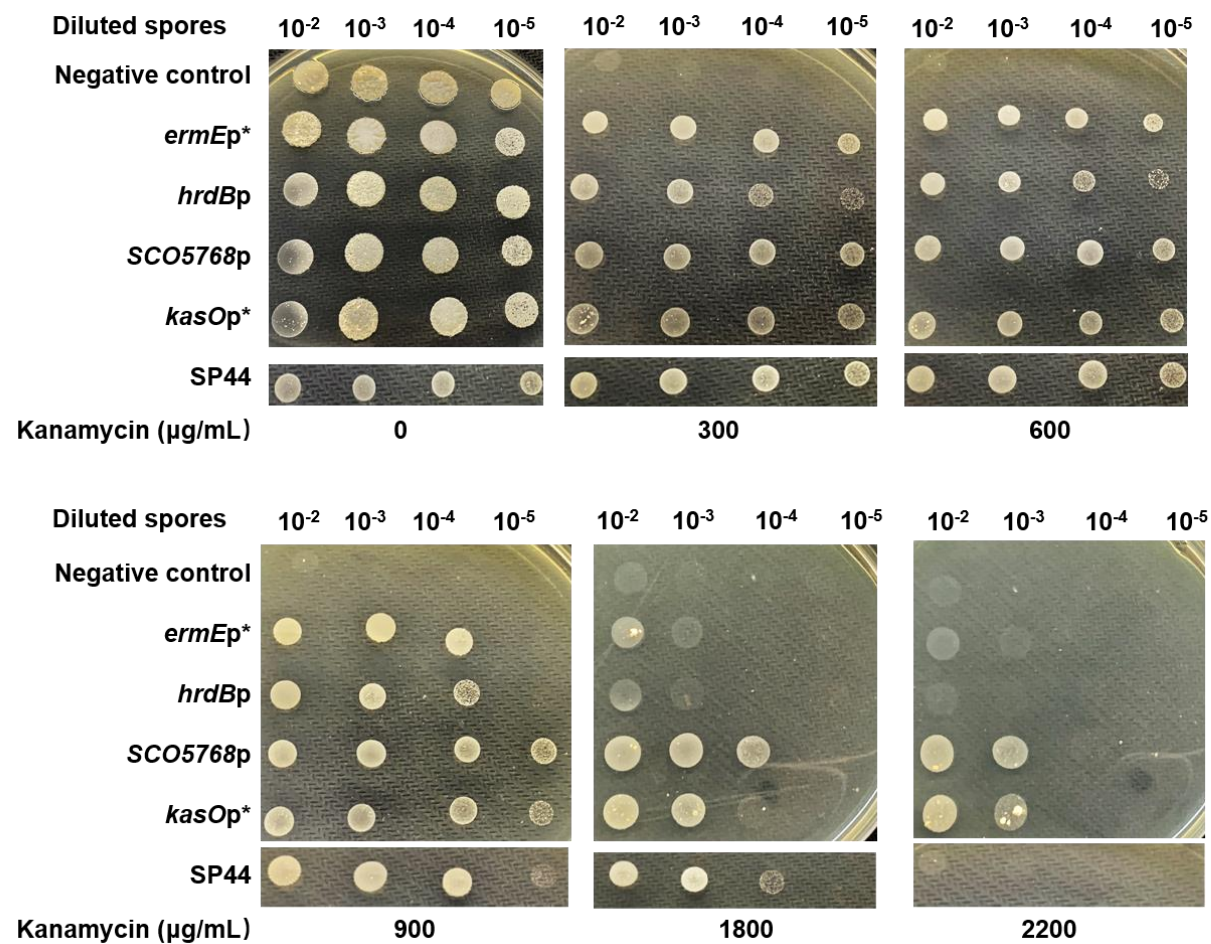

Figures S10: Determination of promoter activity by using *neo* as a reporter gene in *S. armeniacus* DSM 43125 (FM, 30°C, Day 8)



Table S3: Deduced functions and sequence comparison of elaiophylin biosynthetic genes

| Name   | Size (aa) | Proposed function                              | Homolog (aa, identity% /similarity%) [ strain ]                                  |
|--------|-----------|------------------------------------------------|----------------------------------------------------------------------------------|
| Ela6   | 481       | lipase maturation factor family protein        | <a href="#">WP_086883949.1</a> (481, 98/98) [ <i>S. rhizosphaericus</i> ]        |
| Ela5   | 346       | beta-ketoacyl-ACP synthase III                 | <a href="#">WP_044567923.1</a> (346, 96/97) [ <i>S. iranensis</i> ]              |
| Ela4   | 571       | 3-hydroxyacyl-CoA dehydrogenase                | <a href="#">WP_086883947.1</a> (572, 98/98) [ <i>S. rhizosphaericus</i> ]        |
| Ela3   | 958       | AAA family ATPase and lux regulon              | <a href="#">WP_086883946.1</a> (958, 99/99) [ <i>S. rhizosphaericus</i> ]        |
| Ela2   | 325       | glucose-1-phosphate thymidyltransferase        | <a href="#">RLV74943.1</a> (316, 98/98) [ <i>S. rapamycinicus</i> NRRL 5491]     |
| Ela1   | 324       | dTDP-glucose 4,6-dehydratase                   | <a href="#">WP_044567919.1</a> (324, 98/99) [ <i>S. iranensis</i> ]              |
| ElaA   | 4561      | PKS (KS-AT-ACP-KS-AT-DH-KR-ACP-KS-AT-KR-ACP)   | <a href="#">AEM83457.1</a> (4516, 87/89) [ <i>S. violaceusniger</i> Tu 4113]     |
| ElaB   | 1660      | PKS (KS-AT-KR-ACP)                             | <a href="#">WP_037957959.1</a> (1708, 91/93) [ <i>Streptomyces</i> sp. PRh5]     |
| ElaC   | 1648      | PKS (KS-AT-KR-ACP)                             | <a href="#">WP_138910801.1</a> (1677, 95/96) [ <i>Streptomyces</i> sp. DASNCL29] |
| ElaD   | 3388      | PKS (KS-AT-KR-ACP-KS-AT-DH-KR-ACP)             | <a href="#">WP_037962578.1</a> (3386, 97/97) [ <i>Streptomyces</i> sp. PRh5]     |
| ElaE   | 2100      | PKS (KS-AT-DH-KR-ACP-TE)                       | <a href="#">WP_138910799.1</a> (2088, 96/97) [ <i>Streptomyces</i> sp. DASNCL29] |
| Ela1*  | 263       | Type II TE                                     | <a href="#">WP_044567914.1</a> (261, 97/99) [ <i>S. iranensis</i> ]              |
| Ela2*  | 417       | activator-dependent family glycosyltransferase | <a href="#">WP_138910797.1</a> (417, 98/98) [ <i>Streptomyces</i> sp. DASNCL29]  |
| Ela3*  | 198       | dTDP-4-keto-6-deoxy-D-glucose epimerase        | <a href="#">WP_086883282.1</a> (198, 98/98) [ <i>Streptomyces</i> sp. DASNCL29]  |
| Ela4*  | 304       | ABC transporter ATP-binding protein            | <a href="#">WP_020866317.1</a> (304, 100/100) [ <i>Streptomyces</i> ]            |
| Ela5*  | 245       | ABC transporter permease                       | <a href="#">WP_037962594.1</a> (245, 100/100) [ <i>Streptomyces</i> ]            |
| Ela6*  | 420       | sensor histidine kinase                        | <a href="#">EXU62917.1</a> (420, 97/97) [ <i>Streptomyces</i> sp. PRh5]          |
| Ela7*  | 222       | DNA-binding response regulator                 | <a href="#">WP_138910795.1</a> (222, 99/100) [ <i>Streptomyces</i> sp. DASNCL29] |
| Ela8*  | 321       | NAD(P)-dependent oxidoreductase                | <a href="#">WP_037962600.1</a> (321, 97/97) [ <i>Streptomyces</i> sp. PRh5]      |
| Ela9*  | 328       | aldo/keto reductase                            | <a href="#">WP_138910793.1</a> (328, 99/99) [ <i>Streptomyces</i> sp. DASNCL29]  |
| Ela10* | 468       | NDP-hexose 2,3-dehydratase                     | <a href="#">WP_086879683.1</a> (469, 99/99) [ <i>S. rhizosphaericus</i> ]        |
| Ela11* | 446       | crotonyl-CoA carboxylase/reductase             | <a href="#">WP_086879681.1</a> (446, 99/99) [ <i>S. rhizosphaericus</i> ]        |
| Ela12* | 449       | peroxidase                                     | <a href="#">WP_138910790.1</a> (460, 90/91) [ <i>Streptomyces</i> sp. DASNCL29]  |
| Ela13* | 288       | Fpg/Nei family DNA glycosylase                 | <a href="#">WP_138910789.1</a> (288, 99/99) [ <i>Streptomyces</i> sp. DASNCL29]  |

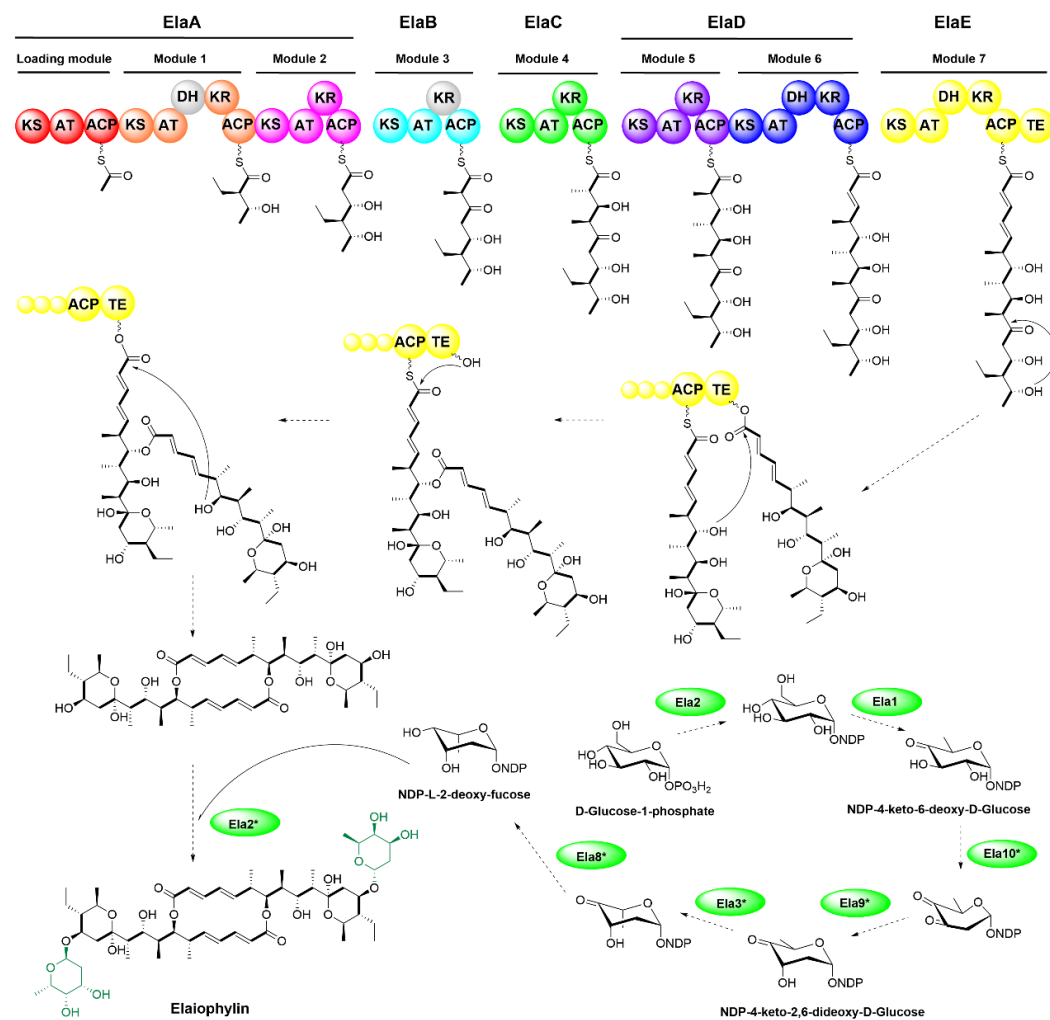

Figure S11 Proposed biosynthetic pathway of elaiophyllin

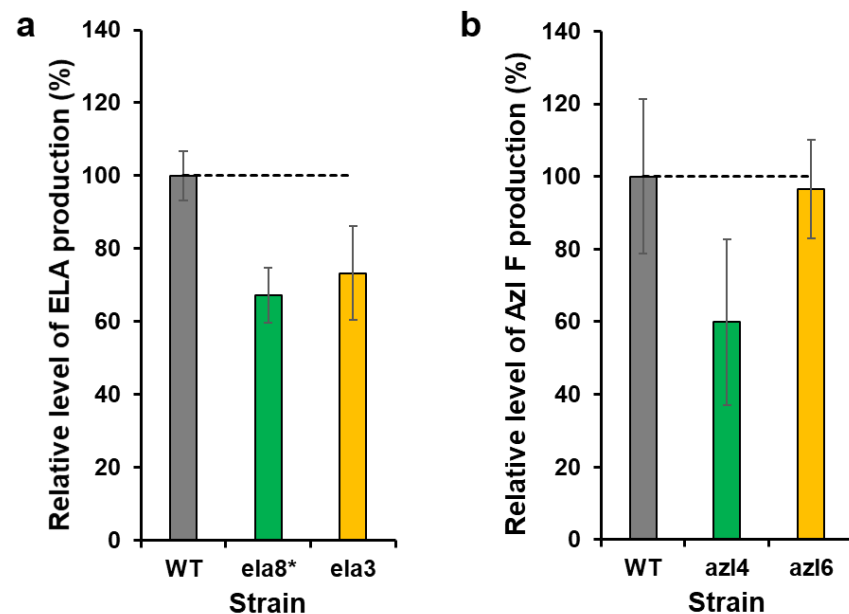

Figure S12 Relative levels of elaiophylin productions by *Streptomyces* sp. 219807 derivative strains detected and quantified by HPLC (a): ELA, elaiophylin; WT, 219807::pWHU1291; *ela8\**, 219807::pMX401; *ela3*, 219807::pMX405. Relative levels of azalomycin F productions by *Streptomyces* sp. 211726 derivative strains detected and quantified by HPLC (b): Azl F, azalomycin F mixtures; WT, 211726::pWHU1291; *azl4*, 211726::pMX404; *azl6*, 211726::pMX403. Error bars indicate the standard deviation (n=3)

## Reference

1. Qiao, Y.; Yan, J.; Jia, J.; Xue, J.; Qu, X.; Hu, Y.; Deng, Z.; Bi, H.; Zhu, D., Characterization of the Biosynthetic Gene Cluster for the Antibiotic Armeniaspirols in *Streptomyces armeniacus*. *Journal of natural products* **2019**, 82, (2), 318-323.
2. Han, Y.; Tian, E.; Xu, D.; Ma, M.; Deng, Z.; Hong, K., Halichoblelides D, a New Elaiophylin Derivative with Potent Cytotoxic Activity from Mangrove-Derived *Streptomyces* sp. 219807. *Molecules* **2016**, 21, (8).
3. Yuan, G.; Lin, H.; Wang, C.; Hong, K.; Liu, Y.; Li, J., <sup>1</sup>H and <sup>13</sup>C assignments of two new macrocyclic lactones isolated from *Streptomyces* sp. 211726 and revised assignments of azalomycins F3a, F4a and F5a. *Magnetic resonance in chemistry : MRC* **2011**, 49, (1), 30-7.
4. Xu, W.; Zhai, G.; Liu, Y.; Li, Y.; Shi, Y.; Hong, K.; Hong, H.; Leadlay, P. F.; Deng, Z.; Sun, Y., An Iterative Module in the Azalomycin F Polyketide Synthase Contains a Switchable Enoylreductase Domain. *Angewandte Chemie* **2017**, 56, (20), 5503-5506.
5. Paget, M. S.; Chamberlin, L.; Atrih, A.; Foster, S. J.; Buttner, M. J., Evidence that the extracytoplasmic function sigma factor sigmaE is required for normal cell wall structure in *Streptomyces coelicolor* A3(2). *J Bacteriol* **1999**, 181, (1), 204-11.
6. MacNeil, D. J.; Gewain, K. M.; Ruby, C. L.; Dezeny, G.; Gibbons, P. H.; MacNeil, T., Analysis of *Streptomyces avermitilis* genes required for avermectin biosynthesis utilizing a novel integration vector. *Gene* **1992**, 111, (1), 61-8.
7. Sun, Y.; He, X.; Liang, J.; Zhou, X.; Deng, Z., Analysis of functions in plasmid pHZ1358 influencing its genetic and structural stability in *Streptomyces lividans* 1326. *Applied microbiology and biotechnology* **2009**, 82, (2), 303-10.
8. Bierman, M.; Logan, R.; O'Brien, K.; Seno, E. T.; Rao, R. N.; Schoner, B. E., Plasmid cloning vectors for the conjugal transfer of DNA from *Escherichia coli* to *Streptomyces* spp. *Gene* **1992**, 116, (1), 43-9.
9. Wilkinson, C. J.; Hughes-Thomas, Z. A.; Martin, C. J.; Bohm, I.; Mironenko, T.; Deacon, M.; Wheatcroft, M.; Wirtz, G.; Staunton, J.; Leadlay, P. F., Increasing the efficiency of heterologous promoters in actinomycetes. *Journal of molecular microbiology and biotechnology* **2002**, 4, (4), 417-26.
10. Wang, W.; Li, X.; Wang, J.; Xiang, S.; Feng, X.; Yang, K., An engineered strong promoter for streptomycetes. *Applied and environmental microbiology* **2013**, 79, (14), 4484-92.
11. Zhang, B.; Tian, W.; Wang, S.; Yan, X.; Jia, X.; Pierens, G. K.; Chen, W.; Ma, H.; Deng, Z.; Qu, X., Activation of Natural Products Biosynthetic Pathways via a Protein Modification Level Regulation. *ACS Chem Biol* **2017**, 12, (7), 1732-1736.
12. Wang, T.; Bai, L.; Zhu, D.; Lei, X.; Liu, G.; Deng, Z.; You, D., Enhancing macrolide production in *Streptomyces* by coexpressing three heterologous genes. *Enzyme Microb Technol* **2012**, 50, (1), 5-9.
13. Du, D.; Zhu, Y.; Wei, J.; Tian, Y.; Niu, G.; Tan, H., Improvement of gougerotin and nikkomycin production by engineering their biosynthetic gene clusters. *Applied microbiology and biotechnology* **2013**, 97, (14), 6383-96.
